# Supplementary material for: Molecular engineering of polymeric carbon nitride for photocatalytic hydrogen production with ultrahigh apparent quantum efficiency
Source: Royal Society of Chemistry journal article supplement (doi:10.1039/d4ta00434e), 2024-01-01
Supplement: d4ta00434e1.pdf [file d4ta00434e1.pdf]

# **Molecular engineering of polymeric carbon nitride for photocatalytic hydrogen production with ultrahigh apparent quantum efficiency**

*Haiyang Liu,<sup>a,1</sup> Xiaolu Liu,<sup>b,1</sup> Chengqun Xu,<sup>\*ad</sup> Dongyu Wang,<sup>a</sup> Dezhi Li,<sup>a</sup> Jingyao Huang,<sup>a</sup> Shengquan Wu,<sup>a</sup> Zhichun Wang,<sup>a</sup> and Hui Pan<sup>\*b,c</sup>*

<sup>a</sup>School of Applied Physics and Materials, Wuyi University, Jiangmen 529020, P. R. China. E-mail: [xuchengqun2019@yeah.net](mailto:xuchengqun2019@yeah.net)

<sup>b</sup>Institute of Applied Physics and Materials Engineering, University of Macau, Macao SAR, 999078, P. R. China. Email: [huipan@um.edu.mo](mailto:huipan@um.edu.mo)

<sup>c</sup>Department of Physics and Chemistry, Faculty of Science and Technology, University of Macau, Macao SAR, 999078, P. R. China

<sup>d</sup>International Center for Materials Nanoarchitectonics (WPI-MANA), National Institute for Materials Science (NIMS), 1-1 Namiki, Tsukuba, Ibaraki 305-0044, Japan.

**Computational details:**

Band structures of MCN and MCN-*x*TAP-NaK were computed based on the density functional theory (DFT). The Perdew-Burke-Ernzerhof (PBE) functional and plane-wave ultrasoft pseudopotential implemented in the CASTEP code were used [1, 2]. This level of theory has been widely tested and afforded reasonable results on the electronic structures and energetics for C<sub>3</sub>N<sub>4</sub> and its derivatives [3, 4]. Because the weak interactions are not well described by the standard PBE functional, the DFT-D approach within the Grimme scheme was adopted for the vdW corrections [5]. A 340 eV energy cutoff and a 3 × 3 × 1 k-point mesh were used. The convergence tolerance of energy was taken as 10<sup>-5</sup> eV/atom, and the maximum allowed force and displacement were set as 0.03 eV/Å and 0.001 Å, respectively. A large vacuum space of 15 Å in the z direction was applied to eliminate the interactions between neighboring layers.

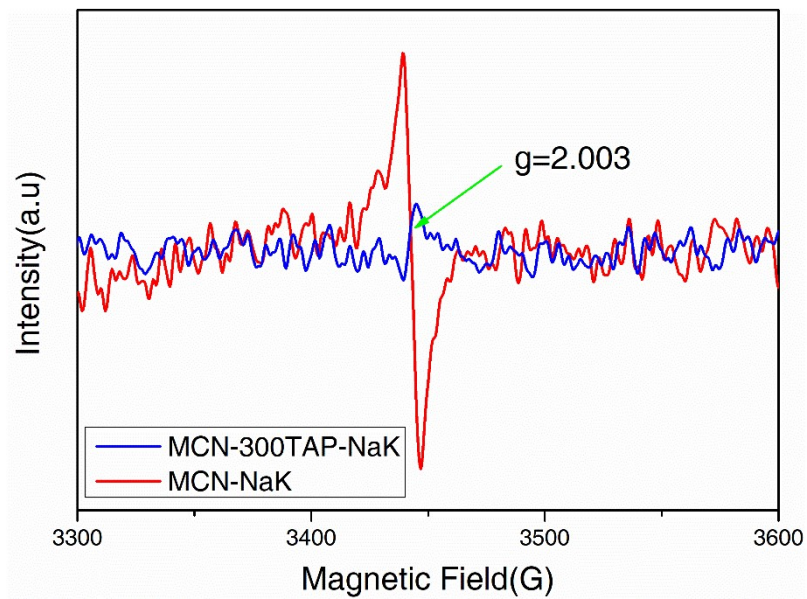

**Figure S1.** EPR spectra of MCN-NaK and MCN-300TAP-NaK in the dark.

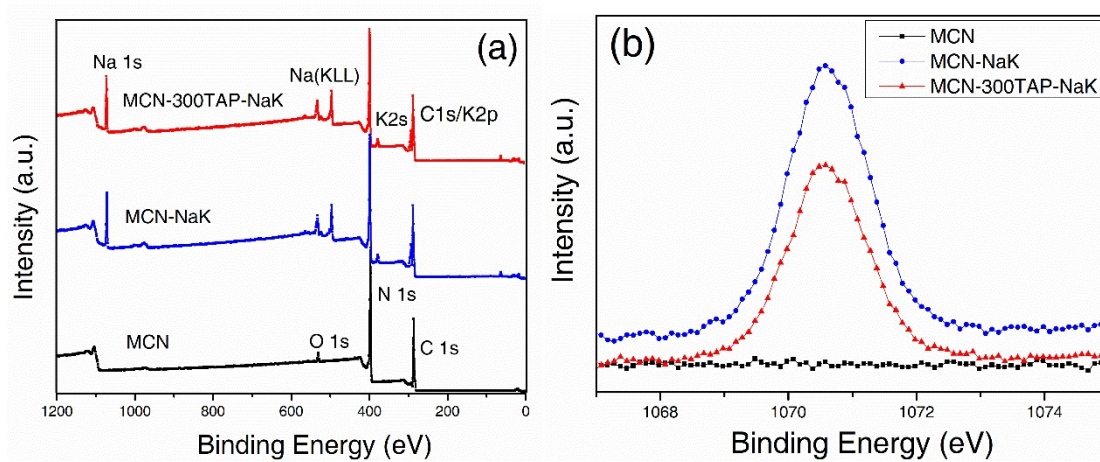

**Figure S2.** X-ray photoelectron spectra of MCN, MCN-NaK and MCN-300TAP-NaK: (a) survey and (b) Na 1s.

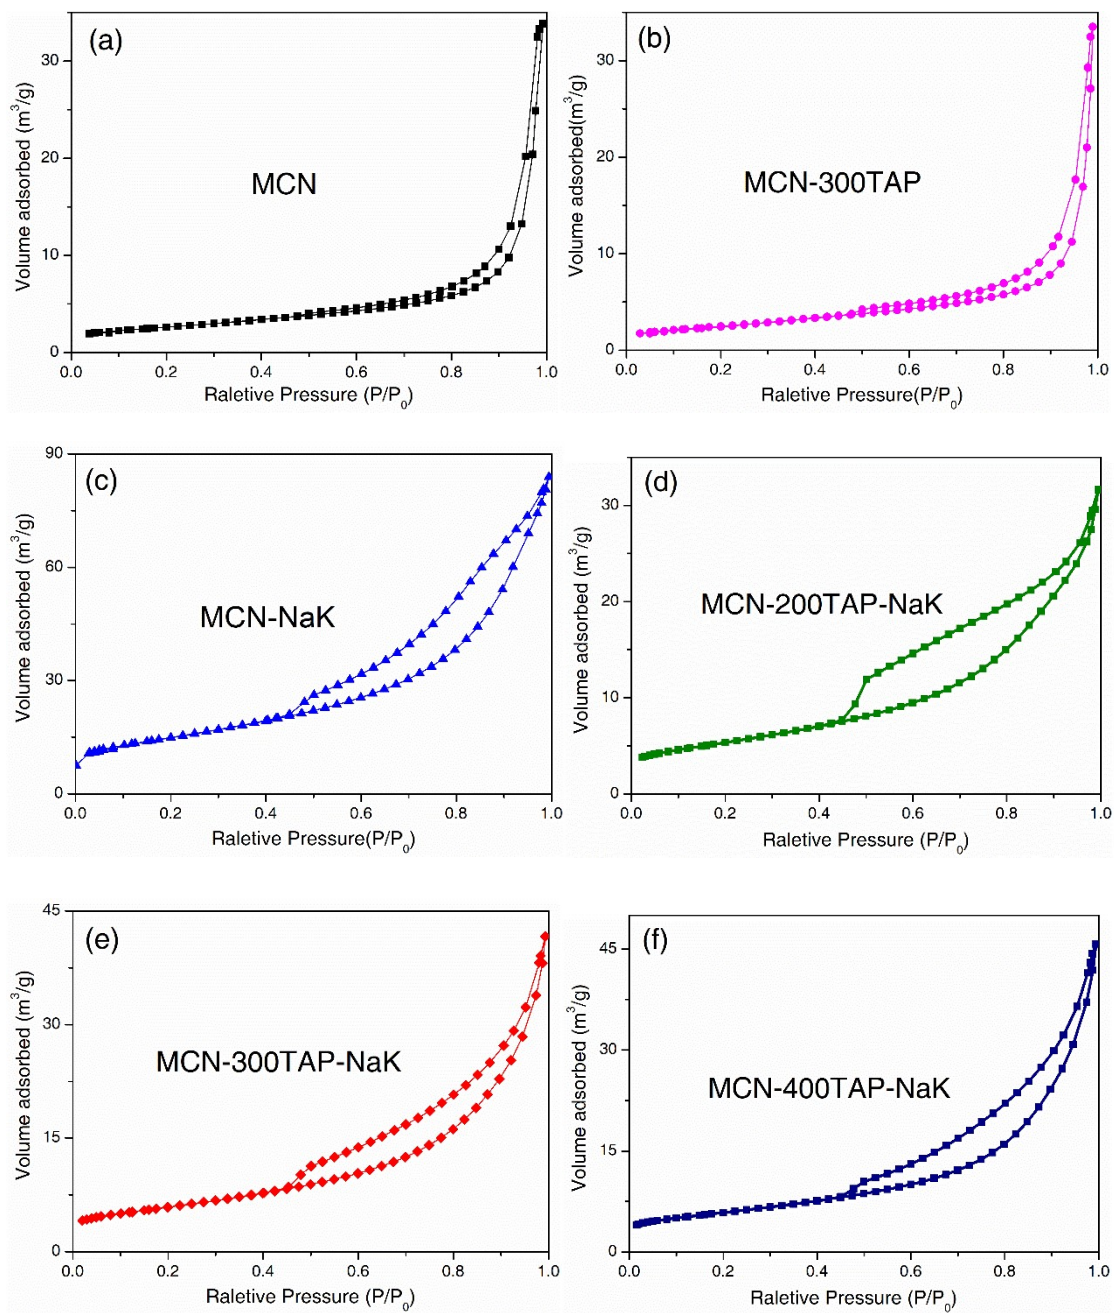

**Figure S3.**  $N_2$  adsorption/desorption isotherms of MCN, MCN-NaK and MCN- $x$ TAP-NaK.

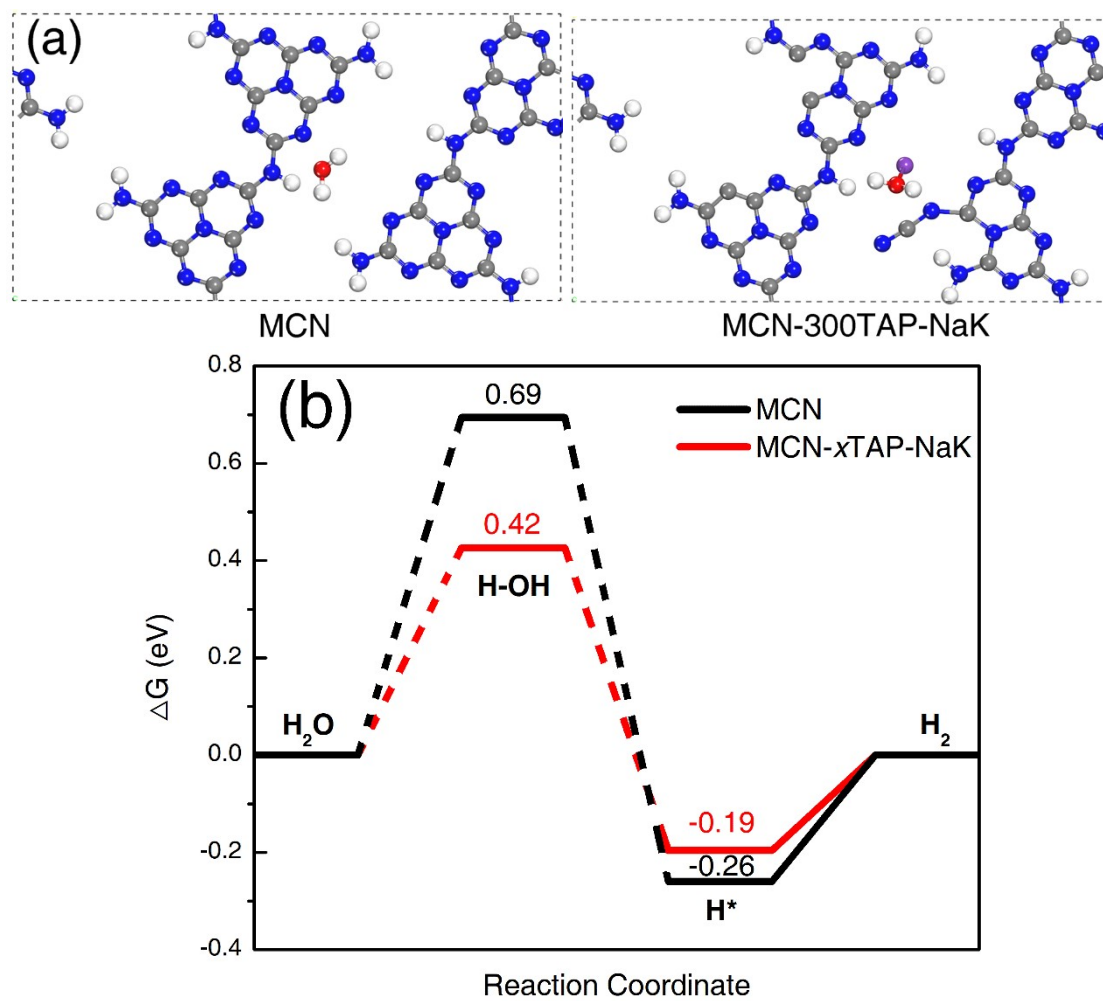

**Figure S4.** (a) Water adsorption models on the surface of MCN and MCN-xTAP-NaK; (b) Free energy diagrams for H<sub>2</sub>O reduction to H<sub>2</sub> by the thermochemical model on MCN and MCN-xTAP-NaK.

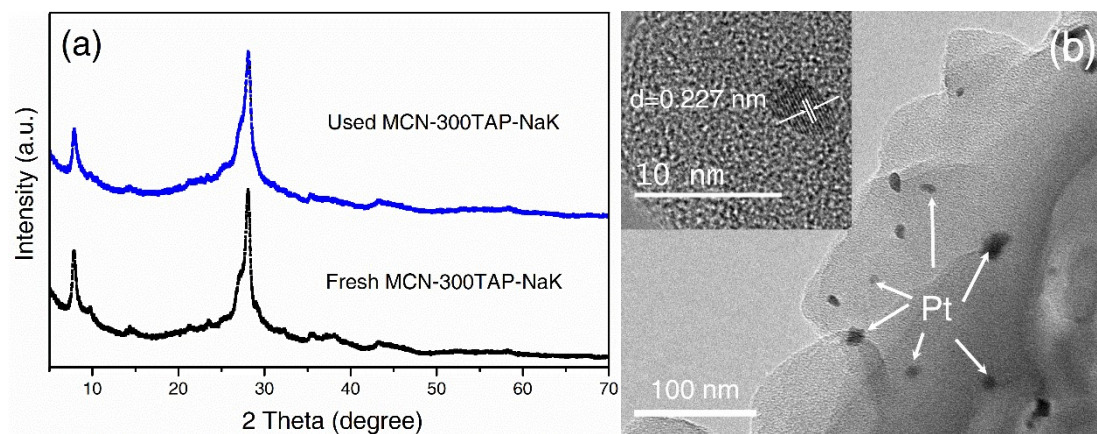

**Figure S5.** (a) XRD patterns and (b) HR-TEM image of MCN-300TAP-NaK after photocatalytic H<sub>2</sub> evolution.

**Table S1.** EIS fitted parameters of MCN, MCN-NaK and MCN-xTAP-NaK. The equivalent circuits consist of series resistance ( $R_s$ ), the charge transfer resistance ( $R_{ct}$ ) and the constant phase element (CPE1).

|                        | MCN    | MCN-<br>300TA | MCN-<br>NaK | MCN-<br>200TAP-NaK | MCN-<br>300TAP-NaK | MCN-<br>400TAP-NaK |
|------------------------|--------|---------------|-------------|--------------------|--------------------|--------------------|
|                        |        | P             |             |                    |                    |                    |
| $R_s$ ( $\Omega$ )     | 324.9  | 310.1         | 316.4       | 301.2              | 301.9              | 297.1              |
| $R_{ct}$ ( $\Omega$ )  | 167150 | 98567         | 74934       | 59372              | 42269              | 46989              |
| CPE1<br>(F)* $10^{-5}$ | 1.04   | 1.03          | 1.16        | 1.09               | 1.06               | 1.12               |



**Table S2.** AQE values of the as-prepared samples in the presence of different molten salts under a series of monochromatic light irradiations.

| Samples                                              | AQE <sub>450 nm</sub> | AQE <sub>500 nm</sub> | AQE <sub>550 nm</sub> | AQE <sub>600 nm</sub> | AQE <sub>650 nm</sub> |
|------------------------------------------------------|-----------------------|-----------------------|-----------------------|-----------------------|-----------------------|
| MCN-300TAP-NaK<br>(no salts)                         | 14.2%                 | 12.0%                 | 4.4%                  | 0.8%                  | 0.3%                  |
| MCN-300TAP-NaK<br>(NaCl)                             | 59.8%                 | 21.5%                 | 8.0%                  | 0.7%                  | 0.4%                  |
| MCN-300TAP-NaK<br>(K <sub>2</sub> HPO <sub>4</sub> ) | 77.8%                 | 29.4%                 | 12.1%                 | 1.8%                  | 0.5%                  |
| MCN-300TAP-NaK<br>(KCl)                              | 46.2%                 | 17.5%                 | 4.7%                  | 0.4%                  | 0.2%                  |
| MCN (no salts)                                       | 0.9%                  | 0                     | 0                     | 0                     | 0                     |

**Table S3.** Comparison of photocatalytic activity of the reported g-C<sub>3</sub>N<sub>4</sub>.

| Catalyst                                                                     | Light Source              | Reaction Conditions                          | Apparent quantum efficiency    | Ref.             |
|------------------------------------------------------------------------------|---------------------------|----------------------------------------------|--------------------------------|------------------|
| MCN-300TAP-NaK (K <sub>2</sub> HPO <sub>4</sub> )                            | 300 W Xe lamp             | 3 wt% of Pt;                                 | 77.8% (450 nm)                 | <b>This work</b> |
|                                                                              |                           | Aqueous TEOA                                 | 29.4% (500 nm)                 |                  |
|                                                                              |                           | solution (10 vol%)                           | 12.1% (550 nm)                 |                  |
|                                                                              |                           |                                              | 1.8% (600 nm)                  |                  |
| CN-ATZ-NaK (K <sub>2</sub> HPO <sub>4</sub> )                                | 50 W White LED light      | 3 wt% of Pt; Aqueous MeOH solution (10 vol%) | 65% (420 nm)                   | [6]              |
| g-C <sub>3</sub> N <sub>4</sub> nanosheet (K <sub>2</sub> HPO <sub>4</sub> ) | 300 W Xe lamp             | 3 wt% of Pt;                                 | 45.7% (380 nm)                 | [7]              |
|                                                                              |                           | Aqueous TEOA solution (10 vol%)              | 26.1% (420 nm)                 |                  |
| CN-NaK (NaCl)                                                                | 50 W White LED light      | 3 wt% of Pt; Aqueous TEOA solution (10 vol%) | 60% (420 nm)                   | [8]              |
| CN-m (NaCl)                                                                  | 50 W White LED light      | 3 wt% of Pt; Aqueous TEOA solution (10 vol%) | 57% (420 nm)                   | [9]              |
| g-CN-1 (K <sub>2</sub> HPO <sub>4</sub> )                                    | 300 W Xe lamp             | 3 wt% of Pt;                                 | 50.7% (405 nm)                 | [10]             |
|                                                                              |                           | Aqueous TEOA solution (10 vol%)              |                                |                  |
| UCN-5TDA                                                                     | 300 W Xe lamp             | 3 wt% of Pt;                                 | 13.3% (450 nm)                 | [11]             |
|                                                                              |                           | Aqueous TEOA                                 | 7.93% (500 nm)                 |                  |
|                                                                              |                           | solution (10 vol%)                           | 1.25% (550 nm)                 |                  |
| UCN-BI <sub>400</sub>                                                        | 300 W Xe lamp, λ > 420 nm | 3 wt% of Pt;                                 | 7% (450 nm)                    | [12]             |
|                                                                              |                           | Aqueous TEOA                                 | 3% (500 nm)                    |                  |
|                                                                              |                           | solution (20 vol%)                           | 0.5% (550 nm)                  |                  |
| UCN-4TAPB                                                                    | 300 W Xe lamp, λ > 420 nm | 3 wt% of Pt;                                 | 40.0% (400 nm)                 | [13]             |
|                                                                              |                           | Aqueous TEOA solution (10 vol%)              | 3.8% (500 nm)                  |                  |
| PTI-0.13                                                                     | 300 W Xe lamp             | 3 wt% of Pt;                                 | 7.0% (420 nm)                  | [14]             |
|                                                                              |                           | Aqueous TEOA                                 | 4.6% (450 nm)                  |                  |
|                                                                              |                           | solution (10 vol%)                           | 0.8% (550 nm)                  |                  |
| O-CN2                                                                        | 300 W Xe lamp             | 1 wt% of Pt;                                 | 13.2% (420 nm)                 | [15]             |
|                                                                              |                           | Aqueous Lactic acid                          | 4.5% (450 nm)                  |                  |
|                                                                              |                           | solution (10 vol%)                           | 1.5% (500 nm)<br>1.0% (550 nm) |                  |
| UM3                                                                          | 300 W Xe lamp             | 1 wt% of Pt;                                 | 27.8% (420 nm)                 | [16]             |
|                                                                              |                           | Aqueous Lactic acid                          | 12% (450 nm)                   |                  |
|                                                                              |                           | solution (20 vol%)                           | 7% (500 nm)                    |                  |
| g-C <sub>3</sub> N <sub>4</sub> (urea)                                       | 300 W Xe lamp             | 3 wt% of Pt;                                 | 26.5% (400 nm)                 | [17]             |
|                                                                              |                           | Aqueous TEOA                                 | 12.5% (420 nm)                 |                  |

## Reference:

- [1] M. Segall, P.J. Lindan, M.a. Probert, C.J. Pickard, P.J. Hasnip, S. Clark, M. Payne, *J. Phys: Condens. Mat.* 14 (2002) 2717.
- [2] J.P. Perdew, K. Burke, M. Ernzerhof, *Phys. Rev. Lett.* 77 (1996) 3865.
- [3] S. Shi, M. Gondal, S. Rashid, Q. Qi, A. Al Saadi, Z. Yamani, Y. Sui, Q. Xu, K. Shen, *Colloid. Surface. A.* 461 (2014) 202-211.
- [4] B. Zhu, J. Zhang, C. Jiang, B. Cheng, J. Yu, *Appl. Catal. B: Environ* 207 (2017) 27-34.
- [5] S. Grimme, *J. Comput. Chem.* 27 (2006) 1787-1799.
- [6] G. Zhang, G. Li, T. Heil, S. Zafeiratos, F. Lai, A. Savateev, M. Antonietti, X. Wang, *Angewandte Chemie International Edition* 58 (2019) 3433-3437.
- [7] G. Liu, T. Wang, H. Zhang, X. Meng, D. Hao, K. Chang, P. Li, T. Kako, J. Ye, *Angewandte Chemie International Edition* 54 (2015) 13561-13565.
- [8] G. Zhang, L. Lin, G. Li, Y. Zhang, A. Savateev, S. Zafeiratos, X. Wang, M. Antonietti, *Angewandte Chemie International Edition* 130 (2018) 9516-9520.
- [9] G. Zhang, G. Li, Z. Lan, L. Lin, A. Savateev, T. Heil, S. Zafeiratos, X. Wang, M. Antonietti, *Angewandte Chemie International Edition* 129 (2017) 13630-13634.
- [10] L. Lin, H. Ou, Y. Zhang, X. Wang, *ACS Catalysis* 6 (2016) 3921-3931.
- [11] C. Xu, X. Liu, H. Liu, D. Li, Y. Yang, S. Lin, D. Fan, H. Pan, *Journal of Materials Chemistry A* 10 (2022) 21031-21043.
- [12] H. Che, C. Li, C. Li, C. Liu, H. Dong, X. Song, *Chemical Engineering Journal* 410 (2021) 127791.
- [13] C. Xu, X. Liu, D. Li, Z. Chen, J. Yang, J. Huang, H. Pan, *ACS Applied Materials & Interfaces* 13 (2021) 20114-20124.
- [14] M.K. Bhunia, K. Yamauchi, K. Takanabe, *Angewandte Chemie International Edition* 53 (2014) 11001-11005.
- [15] C. Liu, H. Huang, W. Cui, F. Dong, Y. Zhang, *Applied Catalysis B: Environmental* 230 (2018) 115-124.
- [16] N. Tian, Y. Zhang, X. Li, K. Xiao, X. Du, F. Dong, G.I. Waterhouse, T. Zhang, H. Huang, *Nano Energy* 38 (2017) 72-81.
- [17] D.J. Martin, K. Qiu, S.A. Shevlin, A.D. Handoko, X. Chen, Z. Guo, J. Tang, *Angewandte Chemie International Edition* 53 (2014) 9240-9245.
